# Supplementary material for: The glucose lowering effects of CL 316,243 dissipate with repeated use and are rescued bycilostamide
Source: PubMed Central journal article supplement (PMC8855634; doi:10.14814/phy2.15187), 2022-02-18
Supplement: PHY2-10-e15187-s001.pdf [file PHY2-10-e15187-s001.pdf]

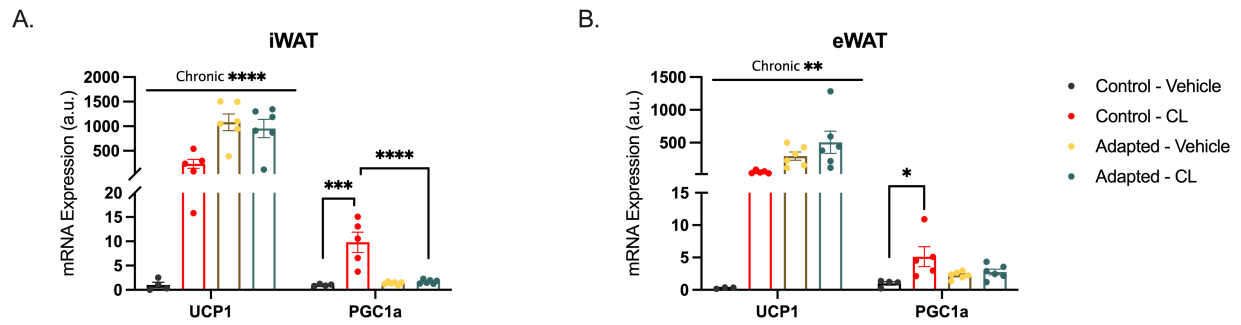

**Supplemental Figure 1: Relative mRNA expression measured in iWAT and eWAT depots after 1 hour of acute CL treatment.** Mice were treated with CL or saline for 6 days then on the seventh day were treated acutely with CL or saline (n=3-6 mice/group). One hour after acute treatment iWAT (A) and eWAT (B) depots were collected for determination of mRNA expression of UCP1 and PGC1a. Differences between groups were analyzed by two-way ANOVA. \*P < 0.05, \*\*P < 0.01, \*\*\*P < 0.001, \*\*\*\*p<0.0001 between indicated groups. All data are presented as mean  $\pm$  SEM.
