# Supplementary material for: The glucose lowering effects of CL 316,243 dissipate with repeated use and are rescued bycilostamide
Source: PubMed Central journal article supplement (PMC8855634; doi:10.14814/phy2.15187), 2022-02-18
Supplement: PHY2-10-e15187-s002.pdf [file PHY2-10-e15187-s002.pdf]

**Supplemental Table 1: mRNA primer sequences used.**

| Gene         | Forward Sequence             | Reverse Sequence             | Reference |
|--------------|------------------------------|------------------------------|-----------|
| <i>Ppib</i>  | <i>GGAGATGGCACAGGAGGAA</i>   | <i>GCCCGTAGTGCTTCAGCTT</i>   | [28]      |
| <i>Ucp1</i>  | <i>ACTGCCACACCTCCAGTCATT</i> | <i>CTTGCCTCACTCAGGATTGG</i>  | [29]      |
| <i>Pgc1a</i> | <i>CCCTGCCATTGTTAAGACC</i>   | <i>TGCTGCTGTTCTGTTTTTC</i>   | [29]      |
| $\beta$ 3AR  | <i>GGCCCTCTCTAGTTCACAG</i>   | <i>TAGCCATCAAACCTGTTGAGC</i> | [30]      |
