# Supplementary material for: The glucose lowering effects of CL 316,243 dissipate with repeated use and are rescued bycilostamide
Source: PubMed Central journal article supplement (PMC8855634; doi:10.14814/phy2.15187), 2022-02-18
Supplement: PHY2-10-e15187-s003.pdf [file PHY2-10-e15187-s003.pdf]

SUPPLEMENTAL TABLE 2: SERUM METABOLITES 1-HOUR POST-TREATMENT

|               | Treatment Groups            |                               |                              |                             | P Value  |         |                 |
|---------------|-----------------------------|-------------------------------|------------------------------|-----------------------------|----------|---------|-----------------|
|               | Control-Vehicle             | Control-CL                    | Adapted-Vehicle              | Adapted-CL                  | Acute CL | Chronic | Acute × Chronic |
| NEFA (mM)     | 0.72 ± 0.04 <sup>a</sup>    | 1.27 ± 0.11 <sup>b</sup>      | 0.65 ± 0.16 <sup>a</sup>     | 0.58 ± 0.03 <sup>a</sup>    | 0.0189   | 0.0007  | 0.0043          |
| GLYCEROL (mM) | 0.52 ± 0.05                 | 0.86 ± 0.06                   | 0.53 ± 0.09                  | 0.65 ± 0.02                 | 0.0006   | 0.0849  | 0.0650          |
| INSULIN (pM)  | 119.51 ± 24.82 <sup>a</sup> | 1252.66 ± 455.42 <sup>b</sup> | 432.66 ± 205.52 <sup>a</sup> | 192.44 ± 40.75 <sup>a</sup> | <0.0001  | <0.0001 | <0.0001         |

**Notes:** Data are represented as the mean ± SEM. NEFA, non-esterified fatty acids; Acute CL, P value for main effect of acute CL 316,243 treatment; Chronic, P value for main effect of adaptation to 6 days of CL 316,243 treatment; Acute × Chronic, P value for interaction between acute CL treatment and adaptation to chronic CL treatment (NEFA and Glycerol n=6-8 per group; Insulin n=3-8 per group). Different superscript lowercase letters denote a significant post hoc comparison.
